# Supplementary material
Source: Springer Nature journal article supplement (https://www.springermedizin.de/resource/supplementary/12889_2007_841_MOESM3_ESM.pdf/9501898)

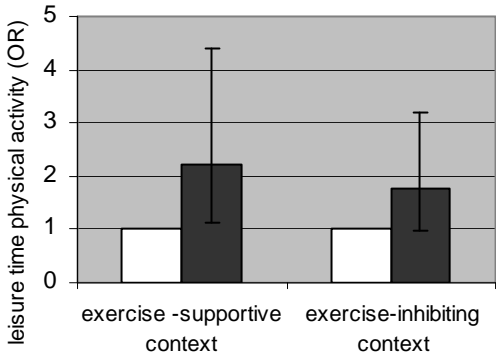

Supplement: MOESM3 [file 9501898]
